# Supplementary material for: Achyrocline satureioides Hydroalcoholic Extract as a Hypoallergenic Antimicrobial Substitute of Natural Origin for Commonly Used Preservatives in Cosmetic Emulsions
Source: MDPI journal article supplement (doi:10.3390/plants12102027), 2023-05-18
Supplement: s1 [file s1]

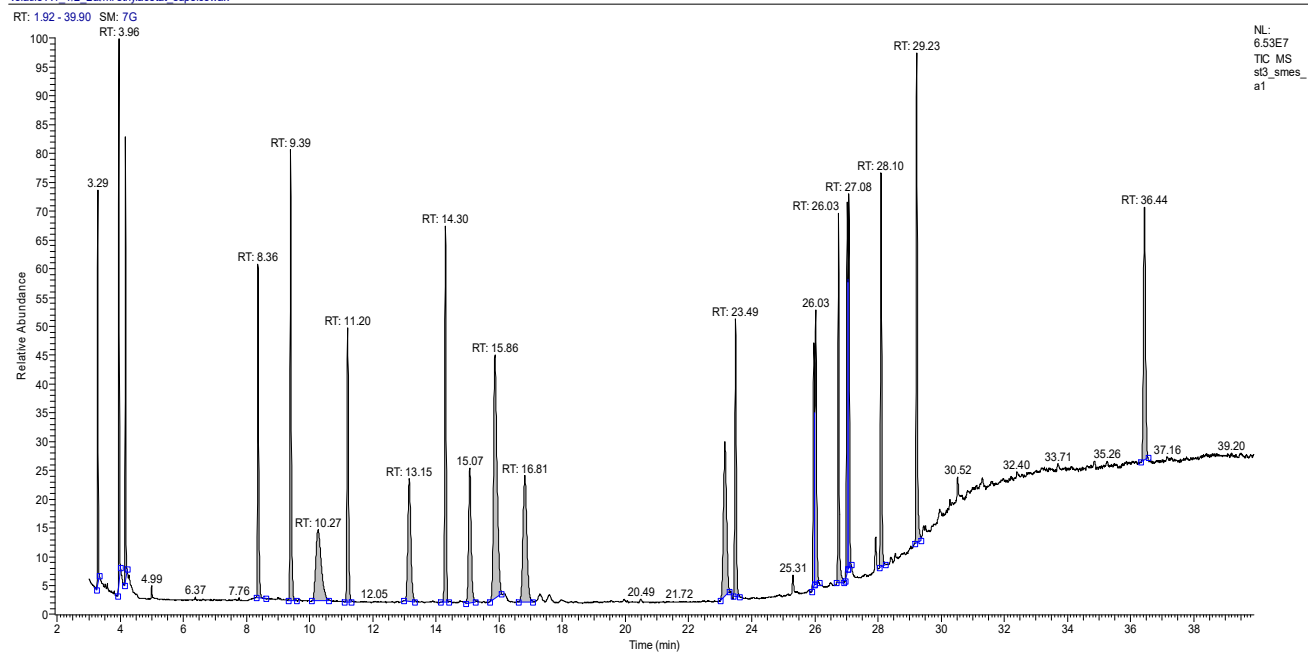

Figure S1. GC-MS chromatogram Allergen Mix 1.

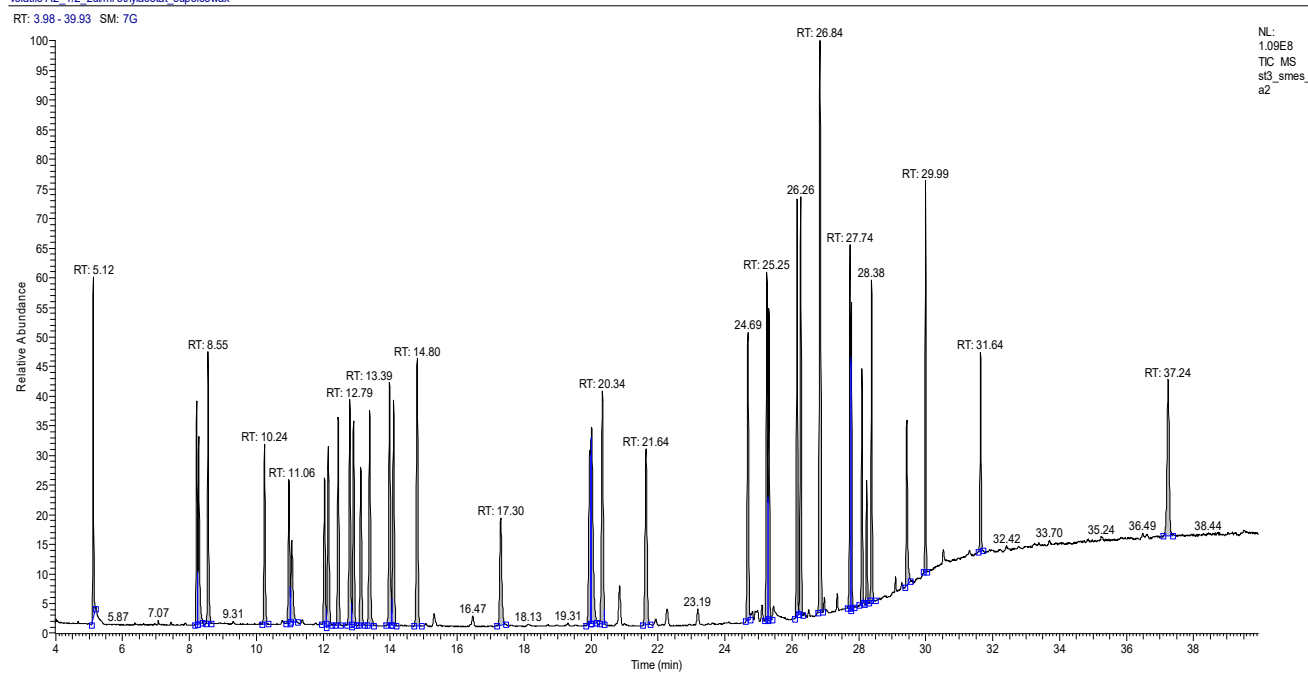

Figure S2. GC-MS chromatogram Allergen Mix 2.

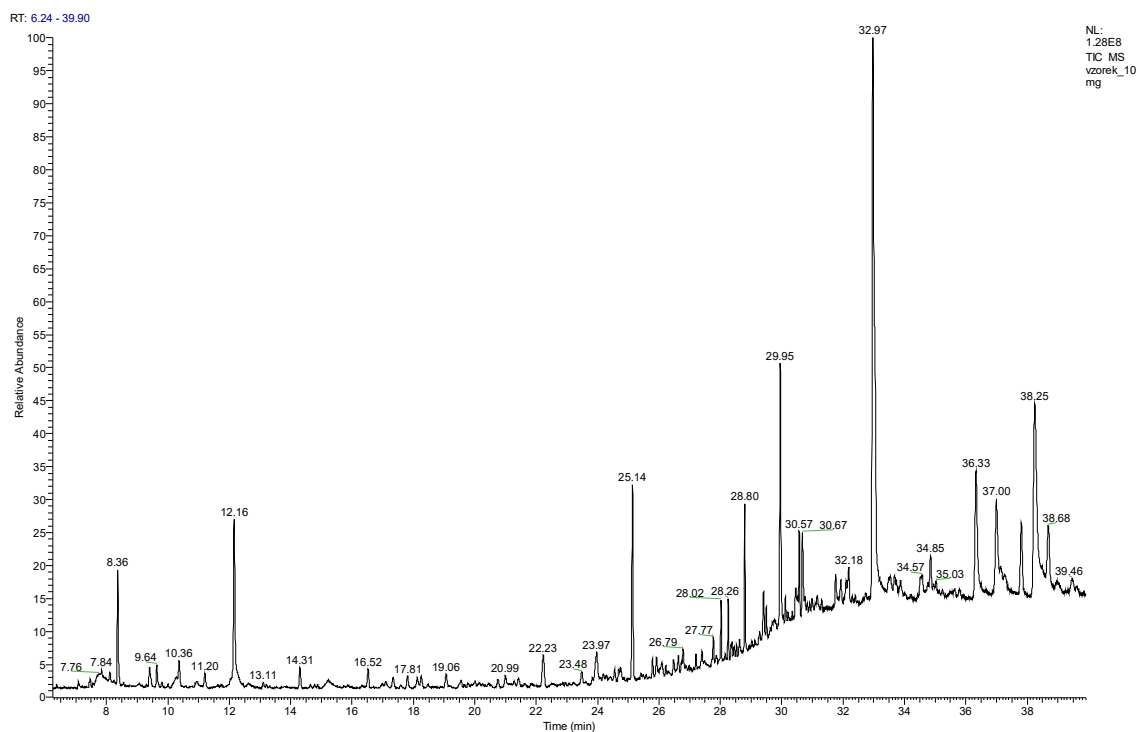

Figure S3. GC-MS chromatogram of *A.satureioides* lyophilized extract (10 mg).

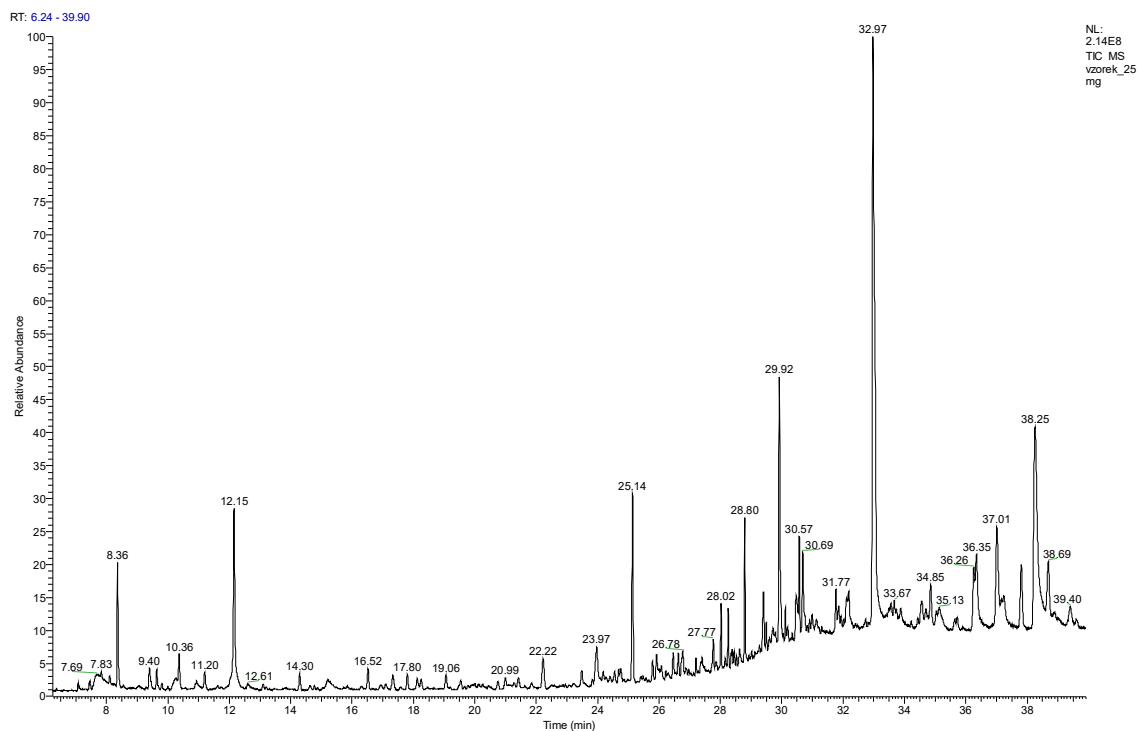

Figure S4. GC-MS chromatogram of *A.satureioides* lyophilized extract (25 mg).

**Table S1.** GC-MS Allergen mix 1 composition.

| Retention time (RT) | Start RT | End RT | Substance                  | CAS number  |
|---------------------|----------|--------|----------------------------|-------------|
| 3.29                | 3.24     | 3.33   | beta-Pinene                | 18172-67-1  |
| 3.96                | 3.92     | 4.00   | alpha-Terpinene            | 99-86-5     |
| 4.16                | 4.12     | 4.21   | Limonene                   | 5989-27-5   |
| 8.36                | 8.30     | 8.61   | Linalool                   | 78-70-6     |
| 9.39                | 9.33     | 9.58   | beta-Caryophyllene         | 87-44-5     |
| 10.27               | 10.07    | 10.59  | Menthol                    | 89-78-1     |
| 11.20               | 11.10    | 11.32  | alpha-Terpineol            | 98-55-5     |
| 13.15               | 12.97    | 13.33  | Citronellol                | 106-22-9    |
| 14.30               | 14.15    | 14.40  | trans-Anethole             | 4180-23-8   |
| 15.07               | 14.95    | 15.25  | Geraniol                   | 106-24-1    |
| 15.86               | 15.70    | 16.08  | Benzyl alcohol             | 100-51-6    |
| 16.81               | 16.61    | 17.05  | Ebanol 1+2                 | 67801-20-1  |
| 23.15               | 23.00    | 23.29  | Trimethyl-benzenepropanol  | 103694-68-4 |
| 23.49               | 23.42    | 23.62  | Eugenol                    | 97-53-0     |
| 25.97               | 25.90    | 26.00  | Anise alcohol              | 105-13-5    |
| 26.03               | 26.00    | 26.13  | Cinnamyl alcohol           | 104-54-1    |
| 26.75               | 26.69    | 26.93  | Isoeugenol (E)             | 5932-68-1   |
| 27.03               | 26.96    | 27.05  | trans,trans-Farnesol       | 106-28-5    |
| 27.08               | 27.05    | 27.15  | alpha-Santalol             | 115-71-9    |
| 28.10               | 28.04    | 28.23  | beta-Santalol              | 77-42-9     |
| 29.23               | 29.17    | 29.36  | alpha-Amylcinnamyl alcohol | 101-85-9    |
| 36.44               | 36.33    | 36.55  | Sclareol                   | 515-03-7    |

**Table S2.** GC-MS Allergen mix 2 composition.

| Retention time (RT) | Start RT | End RT | Substance                                           | CAS number                            |
|---------------------|----------|--------|-----------------------------------------------------|---------------------------------------|
| 5.12                | 5.07     | 5.19   | Terpinolene                                         | 586-62-9                              |
| 8.22                | 8.17     | 8.25   | Camphor                                             | 464-49-1                              |
| 8.28                | 8.25     | 8.39   | Benzaldehyde                                        | 100-52-7                              |
| 8.55                | 8.48     | 8.66   | Linalyl acetate                                     | 115-95-7                              |
| 10.24               | 10.17    | 10.34  | Methyl-2-octynoate                                  | 111-12-6                              |
| 10.97               | 10.89    | 11.01  | Citral - Neral                                      | 5392-40-5                             |
| 11.06               | 11.03    | 11.22  | Salicylaldehyde                                     | 90-02-8                               |
| 12.04               | 11.95    | 12.08  | Citral - Geranial                                   | 5392-40-5                             |
| 12.15               | 12.09    | 12.25  | Carvone                                             | 2244-16-8                             |
| 12.44               | 12.36    | 12.52  | Geranyl acetate                                     | 105-87-1                              |
| 12.79               | 12.7     | 12.84  | alpha-Damascone                                     | 43052-87-5                            |
| 12.9                | 12.84    | 12.99  | Dimethylbenzylcarbinyl acetate (DMBCA)              | 151-05-1                              |
| 13.12               | 13.04    | 13.24  | Methyl salicylate                                   | 119-36-8                              |
| 13.39               | 13.31    | 13.51  | beta-Damascone (E)                                  | 23726-91-2                            |
| 13.98               | 13.88    | 14.03  | delta-Damascone (Rose Ketone-3)                     | 57378-68-4                            |
| 14.1                | 14.05    | 14.18  | beta-Damascenone (Rose Ketone-4)                    | 23696-85-7                            |
| 14.8                | 14.7     | 14.94  | alpha-Isomethylionone                               | 127-51-5                              |
| 17.3                | 17.18    | 17.45  | Hydroxycitronellal                                  | 107-75-5 2                            |
| 19.97               | 19.85    | 19.98  | Cinnamaldehyde                                      | 14371-10-9                            |
| 20.02               | 20       | 20.18  | Butylphenyl methylpropional                         | 80-54-6<br>68155-67-9;<br>54464-57-2; |
| 20.34               | 20.25    | 20.4   | Tetramethylacetyloctahydro-naphthalene (ISO E®)     | 68155-66-8                            |
| 21.64               | 21.55    | 21.78  | Amyl salicylate                                     | 2050-08-0                             |
| 24.69               | 24.62    | 24.76  | alpha-Acetyl cedrene                                | 32388-55-9                            |
| 25.25               | 25.18    | 25.28  | alpha-Amylcinnamaldehyde                            | 78605-96-6                            |
| 25.32               | 25.29    | 25.41  | Eugenyl acetate                                     | 93-28-7                               |
| 26.15               | 26.08    | 26.2   | Galaxolide 1                                        | 1222-05-5                             |
| 26.26               | 26.21    | 26.32  | Galaxolide 2                                        | 1222-05-5                             |
| 26.84               | 26.77    | 26.91  | Hexadecanolactone / Dihydroambrettolide             | 109-29-5                              |
| 27.74               | 27.65    | 27.76  | Isoeugenyl acetate                                  | 93-29-8                               |
| 27.78               | 27.76    | 27.86  | 3-Propylidene phthalide                             | 17369-59-4                            |
| 28.1                | 28.01    | 28.14  | Coumarin                                            | 91-64-5                               |
| 28.24               | 28.17    | 28.3   | Hydroxyisohexyl 3-cyclohexene carboxaldehyde (HICC) | 31906-04-4                            |
| 28.38               | 28.33    | 28.5   | Hydroxyisohexyl 3-cyclohexene carboxaldehyde (HICC) | 31906-04-4                            |
| 29.43               | 29.39    | 29.55  | Vanillin                                            | 121-33-5                              |
| 29.99               | 29.93    | 30.04  | Benzyl benzoate                                     | 120-51-4                              |
| 31.64               | 31.57    | 31.71  | Benzyl salicylate                                   | 118-58-1                              |
| 37.24               | 37.1     | 37.37  | Benzyl cinnamate                                    | 103-41-3                              |

**Table S3.** Fragrance allergen composition of *A.satureioides* lyophilized extract (10 mg).

| <b>Retention<br/>time (RT)</b> | <b>Start<br/>RT</b> | <b>End<br/>RT</b> | <b>Substance</b>   | <b>CAS number</b> |
|--------------------------------|---------------------|-------------------|--------------------|-------------------|
| 8.36                           | 8.30                | 8.61              | Linalool           | 78-70-6           |
| 9.40                           | 9.33                | 9.58              | beta-Caryophyllene | 87-44-5           |
| 10.24                          | 10.07               | 10.59             | Menthol            | 89-78-1           |
| 11.20                          | 11.10               | 11.32             | alpha-Terpineol    | 98-55-5           |
| 12.16                          | 12.09               | 12.25             | Carvone            | 2244-16-8         |
| 14.31                          | 14.15               | 14.40             | trans-Anethole     | 4180-23-8         |
| 23.48                          | 23.42               | 23.62             | Eugenol            | 97-53-0           |
| 29.43                          | 29.39               | 29.55             | Vanillin           | 121-33-5          |

**Table S4.** Fragrance allergen composition of *A.satureioides* lyophilized extract (25 mg).

| <b>Retention<br/>time (RT)</b> | <b>Start<br/>RT</b> | <b>End<br/>RT</b> | <b>Substance</b>   | <b>CAS number</b> |
|--------------------------------|---------------------|-------------------|--------------------|-------------------|
| 8.36                           | 8.30                | 8.61              | Linalool           | 78-70-6           |
| 9.40                           | 9.33                | 9.58              | beta-Caryophyllene | 87-44-5           |
| 10.24                          | 10.07               | 10.59             | Menthol            | 89-78-1           |
| 11.20                          | 11.10               | 11.32             | alpha-Terpineol    | 98-55-5           |
| 12.16                          | 12.09               | 12.25             | Carvone            | 2244-16-8         |
| 14.31                          | 14.15               | 14.40             | trans-Anethole     | 4180-23-8         |
| 23.49                          | 23.42               | 23.62             | Eugenol            | 97-53-0           |
| 29.43                          | 29.39               | 29.55             | Vanillin           | 121-33-5          |
